# Supplementary material for: Integrated single-cell and bulk RNA sequencing identifies SERPING1 as an immune infiltration regulator and therapeutic target in Triple-negative breast cancer
Source: Research Square preprint supplement (doi:10.21203/rs.3.rs-7064973/v1), 2025-08-27
Supplement: Supplementary file 1 [file 53db7a68b1d85288d4dfddb3.docx]

**Title: Integrated single-cell and bulk RNA sequencing identifies SERPING1 as a regulator of immune infiltration and therapeutic target in Triple-negative breast Cancer**

Yuhang Shang1, Jiangwei Liu1, Runze Guo2, Weilun Cheng1, Anbang Hu1, Yansong Liu1, Yunqiang Duan1, Xuelian Wang1, Zhengbo Fang1, Yanling Li1, Hanyu Zhang1, Mingcui Li1, Zhiyuan Rong1, Yuanhao Ji1, Yulin Chen1, Delong Cui1, Yunyi Ji1 and Baoliang Guo *1

**Fig.S1** Box plots of SERPING1 protein expression in normal tissues and breast cancer subtype using the UALCAN tool.

**Fig.S2** Kaplan-Meier survival curve of OS for Normal type TNBC based on Kaplan-Meier plotter database. OS, overall survival. TNBC, triple-negative breast cancer.

**Fig.S3** Immune infiltration analysis of TNBC using (A) EPIC, (B) mcpcounter and (C) CIBERSORT-ABS algorithms. The difference between groups was analyzed using the Wilcox test. Two-sided *P*-values < 0.05 were considered to be statistically significant. **P*-value < 0.05, ***P*-value < 0.01, ****P*-value < 0.001, ns = not significant. TNBC, triple-negative breast cancer.

**Fig.S4** Identification of 9 cell clusters and SERPING1 location in TNBC based on single cell RNA sequencing data. (A) Expression levels of marker genes for each cell type in GSE176078. (B) UMAP plot for the dimension reduction and visualization of 8 cell clusters of fibroblasts (left) and the expression levels of SERPING1 (right) in GSE176078. UMAP, uniform manifold approximation and projection; TNBC, triple negative breast cancer.


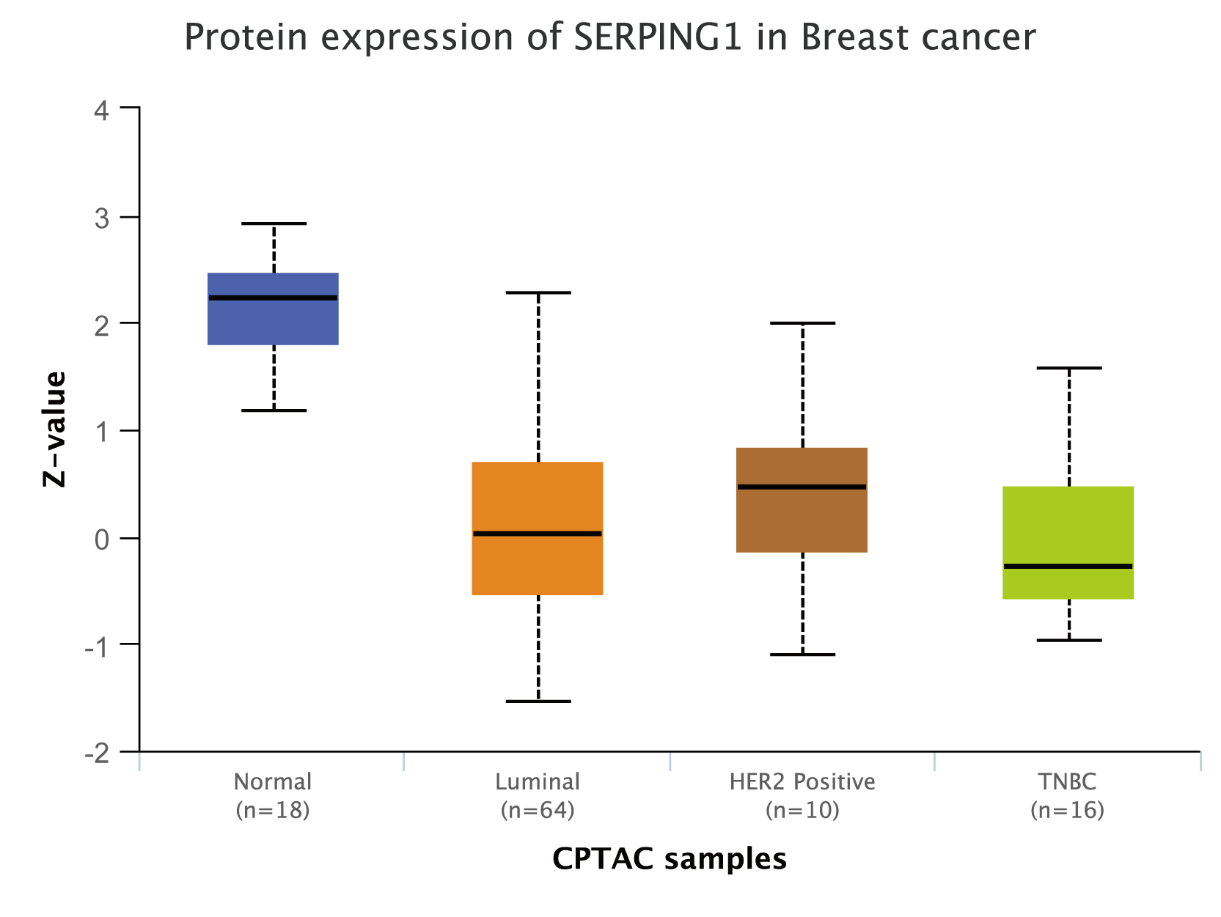


**Fig.S1** Box plots of SERPING1 protein expression in normal tissues and breast cancer subtype using the UALCAN tool.


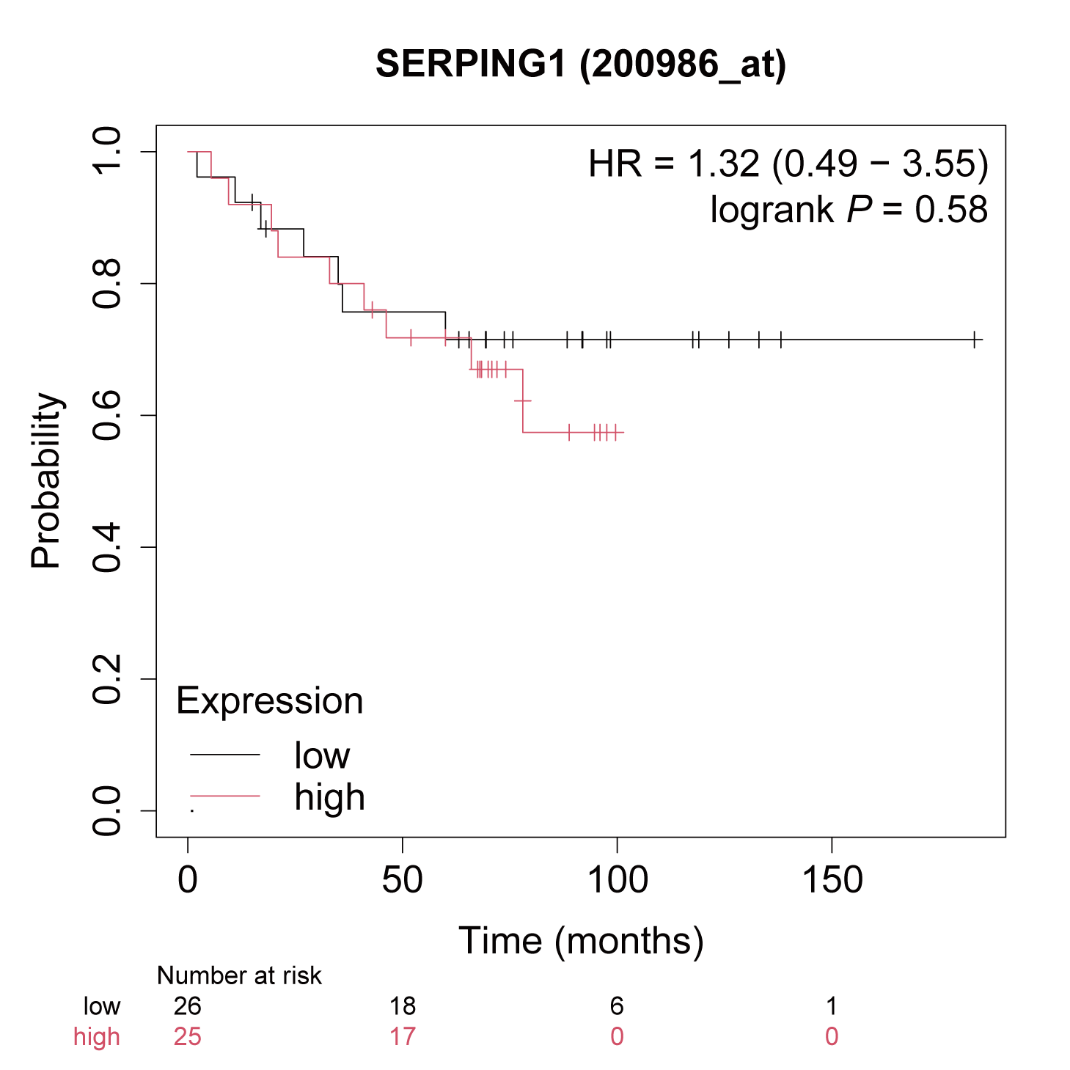


**Fig.S2** Kaplan-Meier survival curve of OS for Normal type TNBC based on Kaplan-Meier plotter database. OS, overall survival. TNBC, triple-negative breast cancer.


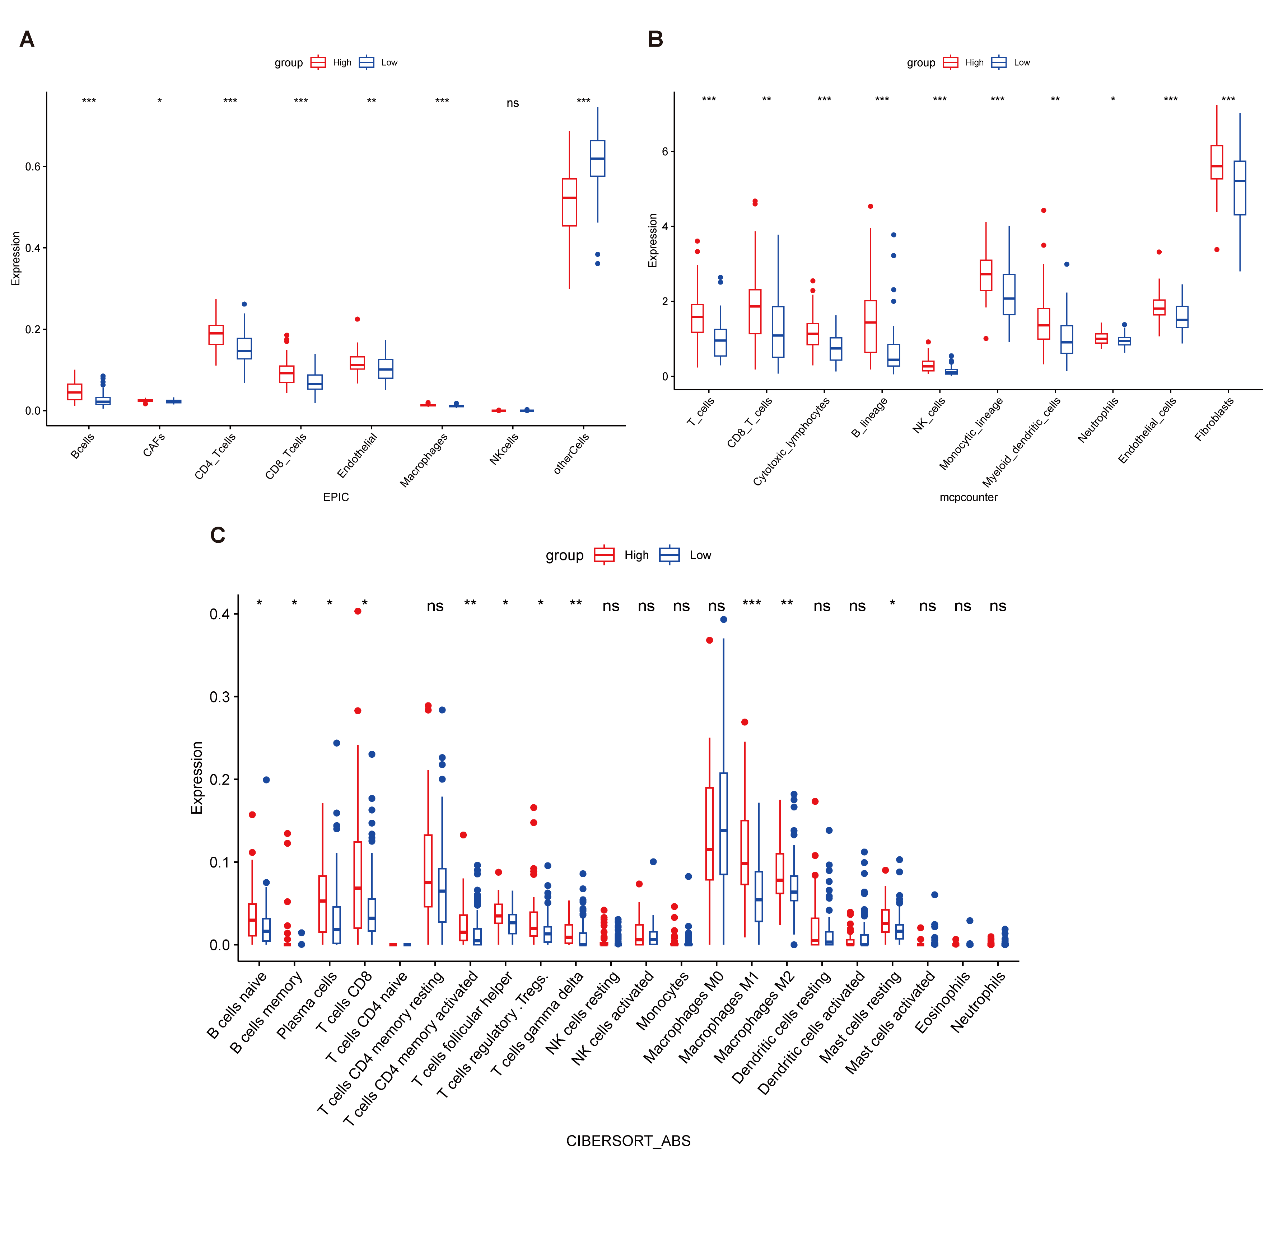


**Fig.S3** Immune infiltration analysis of TNBC using (A) EPIC, (B) mcpcounter and (C) CIBERSORT-ABS algorithms. The difference between groups was analyzed using the Wilcox test. Two-sided *P*-values < 0.05 were considered to be statistically significant. **P*-value < 0.05, ***P*-value < 0.01, ****P*-value < 0.001, ns = not significant. TNBC, triple-negative breast cancer.


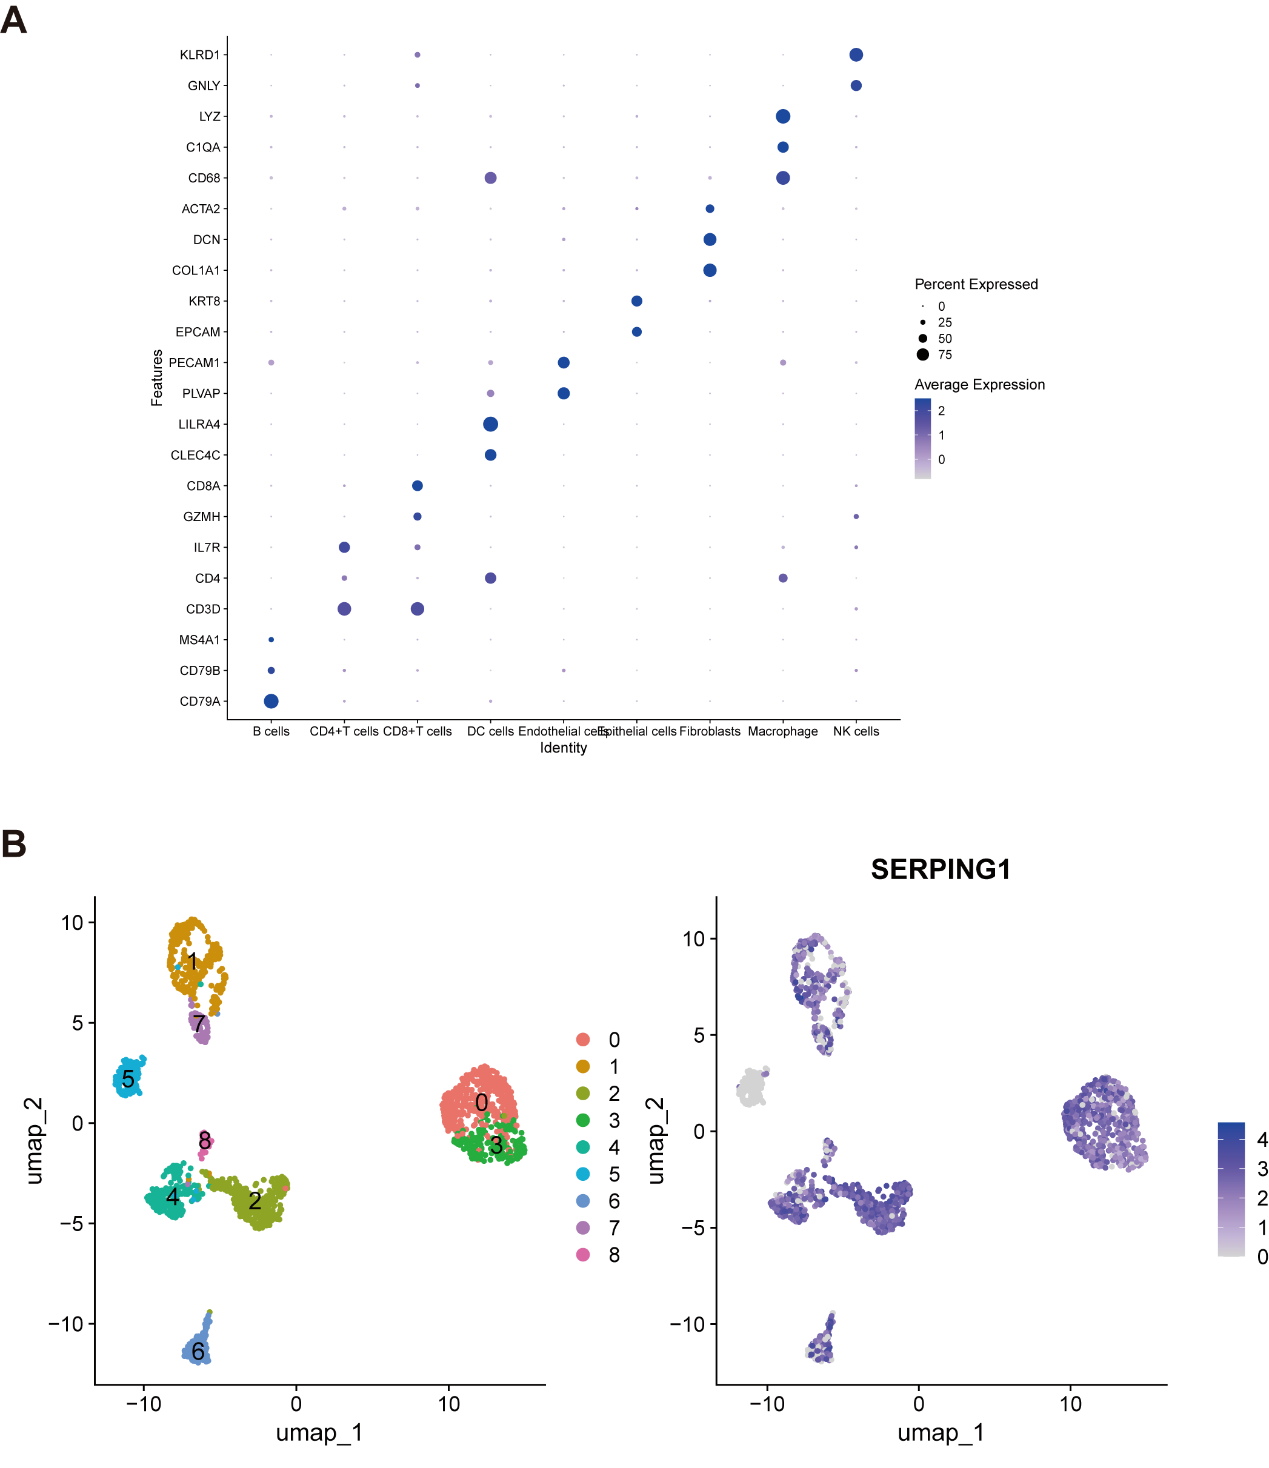


**Fig.S4** Identification of 9 cell clusters and SERPING1 location in TNBC based on single cell RNA sequencing data. (A) Expression levels of marker genes for each cell type in GSE176078. (B) UMAP plot for the dimension reduction and visualization of 8 cell clusters of fibroblasts (left) and the expression levels of SERPING1 (right) in GSE176078. UMAP, uniform manifold approximation and projection; TNBC, triple negative breast cancer.
