# Supplementary material for: Integrated single-cell and bulk RNA sequencing identifies SERPING1 as an immune infiltration regulator and therapeutic target in Triple-negative breast cancer
Source: Research Square preprint supplement (doi:10.21203/rs.3.rs-7064973/v1), 2025-08-27
Supplement: Supplementary file 2 [file b5e77b947ed94683ba2b177a.docx]

**Title: Integrated single-cell and bulk RNA sequencing identifies SERPING1 as a regulator of immune infiltration and therapeutic target in Triple-negative breast Cancer**

Yuhang Shang1, Jiangwei Liu1, Runze Guo2, Weilun Cheng1, Anbang Hu1, Yansong Liu1, Yunqiang Duan1, Xuelian Wang1, Zhengbo Fang1, Yanling Li1, Hanyu Zhang1, Mingcui Li1, Zhiyuan Rong1, Yuanhao Ji1, Yulin Chen1, Delong Cui1, Yunyi Ji1 and Baoliang Guo *1

**Table S1** ESTIMATE analysis of 118 TNBC samples of TCGA database.

**Table S2** Univariate Cox regression analysis identified 46 genes significantly associated with OS.

**Table S3** LASSO COX regression analysis identified 11 hub genes

**Table S1** ESTIMATE analysis of 118 TNBC samples of TCGA database.

| Sample | StromalScore | ImmuneScore | ESTIMATEScore | TumorPurity |
| --- | --- | --- | --- | --- |
| TCGA.A1.A0SP | -41.7021 | 1045.362 | 1003.66 | 0.73011 |
| TCGA.E2.A1LS | -363.387 | -290.056 | -653.443 | 0.873198 |
| TCGA.BH.A0B9 | -693.333 | 1686.402 | 993.0685 | 0.731172 |
| TCGA.E2.A1LL | -510.315 | -177.32 | -687.635 | 0.875634 |
| TCGA.D8.A1XK | -449.715 | 912.6305 | 462.9156 | 0.781994 |
| TCGA.AN.A04D | -1119.74 | -810.015 | -1929.75 | 0.948692 |
| TCGA.AR.A0U4 | 621.1444 | 2140.603 | 2761.748 | 0.531539 |
| TCGA.A2.A04Q | 1004.329 | 2743.085 | 3747.414 | 0.40386 |
| TCGA.E2.A1B6 | 57.16508 | 2776.096 | 2833.261 | 0.522618 |
| TCGA.B6.A0RS | 372.617 | 1089.372 | 1461.989 | 0.682521 |
| TCGA.D8.A1JL | 1013.045 | 1721.335 | 2734.38 | 0.534938 |
| TCGA.E9.A1ND | 660.8997 | 2225.653 | 2886.552 | 0.515933 |
| TCGA.D8.A147 | -82.6621 | 889.0188 | 806.3567 | 0.749592 |
| TCGA.A1.A0SO | -1148.25 | -616.17 | -1764.42 | 0.94074 |
| TCGA.D8.A27M | 1140.073 | 2012.684 | 3152.756 | 0.482075 |
| TCGA.A7.A26G | 1576.192 | 1339.648 | 2915.84 | 0.512246 |
| TCGA.E2.A1LI | -415.71 | 937.3523 | 521.6424 | 0.776592 |
| TCGA.AO.A129 | 266.0361 | 1560 | 1826.036 | 0.642509 |
| TCGA.AR.A0TS | 627.9921 | 2161.411 | 2789.403 | 0.528096 |
| TCGA.BH.A0AV | 1192.944 | 562.5564 | 1755.5 | 0.650408 |
| TCGA.D8.A1XQ | 611.2205 | 1500.423 | 2111.644 | 0.609829 |
| TCGA.BH.A18V | 707.4722 | 1265.698 | 1973.17 | 0.625811 |
| TCGA.B6.A0RT | 939.3976 | 3107.095 | 4046.492 | 0.363322 |
| TCGA.A7.A0CE | -393.035 | -65.3264 | -458.362 | 0.858886 |
| TCGA.AO.A124 | -760.519 | 148.379 | -612.14 | 0.870228 |
| TCGA.A2.A0YM | 159.2985 | 1054.716 | 1214.014 | 0.708666 |
| TCGA.AQ.A04J | 970.989 | 1873.273 | 2844.261 | 0.521241 |
| TCGA.AO.A12F | 483.1978 | -157.79 | 325.408 | 0.794415 |
| TCGA.EW.A1P4 | 140.7053 | 1547.182 | 1687.887 | 0.657915 |
| TCGA.AN.A0AR | -791.749 | -404.304 | -1196.05 | 0.909207 |
| TCGA.BH.A18Q | -36.2346 | 769.4218 | 733.1872 | 0.756658 |
| TCGA.B6.A0WX | 1008.316 | 903.4054 | 1911.722 | 0.632821 |
| TCGA.BH.A0BW | 278.7814 | 1825.094 | 2103.876 | 0.610732 |
| TCGA.E2.A1AZ | 966.3399 | 1483.407 | 2449.747 | 0.569761 |
| TCGA.B6.A0RE | -250.425 | 95.67596 | -154.749 | 0.835215 |
| TCGA.D8.A143 | -391.779 | 543.2382 | 151.4597 | 0.809662 |
| TCGA.BH.A0E0 | -705.204 | 312.5582 | -392.646 | 0.853906 |
| TCGA.AR.A0TU | -703.036 | 1176.556 | 473.5202 | 0.781023 |
| TCGA.AN.A0AL | 844.4022 | 1223.026 | 2067.428 | 0.61496 |
| TCGA.B6.A0RU | 213.9476 | -183.695 | 30.25293 | 0.819976 |
| TCGA.D8.A1JF | 797.4261 | 503.3271 | 1300.753 | 0.699626 |
| TCGA.AN.A0AT | -494.121 | 480.0182 | -14.1028 | 0.823685 |
| TCGA.A7.A0DA | 415.0641 | -59.2235 | 355.8406 | 0.791693 |
| TCGA.E2.A14X | 75.37283 | 1256.26 | 1331.633 | 0.69638 |
| TCGA.AR.A0U0 | 136.1834 | 1783.182 | 1919.366 | 0.631951 |
| TCGA.BH.A18T | -366.221 | 294.7857 | -71.4351 | 0.828428 |
| TCGA.BH.A0E6 | -28.8401 | 846.9601 | 818.12 | 0.748448 |
| TCGA.A2.A04T | -277.533 | 1142.505 | 864.9721 | 0.743869 |
| TCGA.C8.A12V | 825.7562 | 2935.829 | 3761.586 | 0.401956 |
| TCGA.A2.A0T2 | 125.5044 | 495.6385 | 621.1429 | 0.767308 |
| TCGA.D8.A27F | 451.8931 | 153.5944 | 605.4874 | 0.76878 |
| TCGA.E2.A1LK | -1065.02 | 108.0662 | -956.954 | 0.894038 |
| TCGA.A2.A1G6 | 540.4143 | 574.8819 | 1115.296 | 0.718815 |
| TCGA.D8.A142 | 975.8299 | 789.324 | 1765.154 | 0.649331 |
| TCGA.BH.A1FC | -63.6297 | 1538.253 | 1474.623 | 0.681164 |
| TCGA.EW.A1P7 | 1155.935 | 2622.418 | 3778.353 | 0.399701 |
| TCGA.E2.A150 | 473.8113 | 1018.465 | 1492.276 | 0.679265 |
| TCGA.BH.A0BG | 105.0192 | 1569.097 | 1674.116 | 0.659436 |
| TCGA.BH.A0RX | 1230.459 | 2205.235 | 3435.694 | 0.445282 |
| TCGA.A2.A0T0 | 387.1224 | 517.7023 | 904.8247 | 0.739947 |
| TCGA.EW.A1P8 | 249.2265 | 1368.977 | 1618.203 | 0.665584 |
| TCGA.A2.A0ST | 643.5019 | 3007.854 | 3651.356 | 0.416719 |
| TCGA.AN.A0FL | -604.882 | -287.079 | -891.96 | 0.889723 |
| TCGA.A2.A04U | -192.344 | -267.208 | -459.553 | 0.858976 |
| TCGA.C8.A27B | -144.439 | 1563.897 | 1419.458 | 0.68707 |
| TCGA.AO.A0J4 | 200.7079 | 1398.914 | 1599.622 | 0.667617 |
| TCGA.C8.A134 | -76.5023 | 1139.15 | 1062.648 | 0.724166 |
| TCGA.E2.A1LG | -1046.62 | 211.4941 | -835.127 | 0.885884 |
| TCGA.C8.A1HJ | -277.601 | 103.2025 | -174.398 | 0.836798 |
| TCGA.C8.A26X | 1248.046 | 2072.027 | 3320.073 | 0.460413 |
| TCGA.BH.A18G | 173.6528 | 455.1272 | 628.78 | 0.766589 |
| TCGA.A2.A04P | 368.5172 | 1256.983 | 1625.5 | 0.664784 |
| TCGA.A2.A0D2 | 212.956 | 1112.835 | 1325.791 | 0.696995 |
| TCGA.E2.A158 | -1184.46 | -432.23 | -1616.69 | 0.933165 |
| TCGA.E2.A14R | -394.689 | 1366.446 | 971.7569 | 0.733302 |
| TCGA.BH.A0B3 | 614.563 | 1322.977 | 1937.54 | 0.629882 |
| TCGA.AR.A1AQ | 475.2275 | 1962.765 | 2437.993 | 0.571178 |
| TCGA.A8.A07C | 53.3704 | 815.1896 | 868.56 | 0.743517 |
| TCGA.BH.A0WA | 176.3732 | 333.39 | 509.7633 | 0.777689 |
| TCGA.A2.A0D0 | -910.621 | 918.182 | 7.561358 | 0.821878 |
| TCGA.BH.A1EW | 435.1019 | 949.7088 | 1384.811 | 0.690757 |
| TCGA.E2.A14N | -659.255 | 831.5408 | 172.2855 | 0.807864 |
| TCGA.EW.A1P1 | 1640.375 | 1492.103 | 3132.478 | 0.48468 |
| TCGA.C8.A131 | 560.2148 | 732.8769 | 1293.092 | 0.700429 |
| TCGA.AO.A128 | 612.2756 | 3034.574 | 3646.85 | 0.41732 |
| TCGA.A2.A0YE | -39.4958 | -264.949 | -304.444 | 0.847097 |
| TCGA.EW.A1OV | 935.6015 | 2631.768 | 3567.369 | 0.427893 |
| TCGA.A1.A0SK | -1423.89 | -1308.92 | -2732.81 | 0.979296 |
| TCGA.B6.A0IK | -8.78646 | 390.8779 | 382.0915 | 0.789333 |
| TCGA.A2.A0CM | 671.7204 | 1701.292 | 2373.013 | 0.578981 |
| TCGA.C8.A26Y | -684.2 | 487.7662 | -196.434 | 0.838565 |
| TCGA.EW.A1PB | 136.2154 | 2430.66 | 2566.875 | 0.555548 |
| TCGA.A8.A09X | 1105.755 | 1705.196 | 2810.951 | 0.525408 |
| TCGA.E9.A22G | -963.995 | 92.96984 | -871.026 | 0.888316 |
| TCGA.E2.A1LH | 587.7227 | 2202.407 | 2790.13 | 0.528006 |
| TCGA.AO.A0JL | -2.11334 | -44.1596 | -46.2729 | 0.826354 |
| TCGA.A2.A0SX | 846.3225 | 1975.563 | 2821.886 | 0.524041 |
| TCGA.AN.A0XU | -625.033 | 656.0423 | 31.00879 | 0.819912 |
| TCGA.BH.A0BL | 1481.81 | 1728.223 | 3210.032 | 0.474692 |
| TCGA.B6.A0IQ | -663.794 | 386.529 | -277.265 | 0.84497 |
| TCGA.E2.A1L7 | 334.4905 | 1419.063 | 1753.554 | 0.650625 |
| TCGA.AN.A0G0 | -105.965 | 66.91378 | -39.051 | 0.825756 |
| TCGA.AO.A0J6 | -699.496 | 1285.474 | 585.9771 | 0.770608 |
| TCGA.D8.A27H | 631.6631 | 274.9321 | 906.5953 | 0.739772 |
| TCGA.AR.A1AR | 1081.832 | 1854.143 | 2935.975 | 0.509705 |
| TCGA.EW.A1OW | 557.488 | 452.9516 | 1010.44 | 0.72943 |
| TCGA.B6.A0RG | 62.84426 | -385.162 | -322.317 | 0.848488 |
| TCGA.B6.A0IE | 72.10889 | -76.3536 | -4.24467 | 0.822864 |
| TCGA.D8.A13Z | 628.1544 | 1151.67 | 1779.825 | 0.647692 |
| TCGA.AR.A256 | -98.0873 | 361.4913 | 263.404 | 0.79991 |
| TCGA.AR.A1AI | -285.236 | 1775.641 | 1490.404 | 0.679466 |
| TCGA.E2.A159 | 539.2971 | 1811.868 | 2351.165 | 0.581593 |
| TCGA.AN.A0FX | 267.9692 | -210.072 | 57.89725 | 0.817646 |
| TCGA.AO.A0J2 | -215.335 | 1045.601 | 830.2667 | 0.747264 |
| TCGA.A8.A08R | 560.6759 | 1448.699 | 2009.375 | 0.621657 |
| TCGA.A8.A07O | -247.942 | 736.8853 | 488.943 | 0.779607 |
| TCGA.AR.A1AY | -129.848 | -24.2418 | -154.09 | 0.835162 |
| TCGA.B6.A0RN | 682.443 | -207.37 | 475.0735 | 0.78088 |

**Table S2** Univariate Cox regression analysis identified 46 genes significantly associated with OS.

| gene | HR | z | pvalue | lower | upper |
| --- | --- | --- | --- | --- | --- |
| NFE2L3 | 0.632451 | -1.99669 | 0.045859 | 0.403379 | 0.991609 |
| LAMP3 | 0.675468 | -2.15972 | 0.030794 | 0.473118 | 0.964361 |
| SH3BP1 | 0.450143 | -2.5192 | 0.011762 | 0.241909 | 0.837622 |
| COL9A3 | 0.615675 | -2.38577 | 0.017043 | 0.413332 | 0.917073 |
| NUAK2 | 0.442742 | -2.28261 | 0.022453 | 0.219947 | 0.891217 |
| ANKDD1B | 187.2647 | 2.143261 | 0.032092 | 1.564395 | 22416.38 |
| JPT2 | 2.515105 | 2.069427 | 0.038506 | 1.049996 | 6.024548 |
| EFNA3 | 1.572455 | 1.961604 | 0.049809 | 1.000379 | 2.471679 |
| FOXP4 | 0.55303 | -2.15815 | 0.030916 | 0.322939 | 0.947058 |
| GBP1 | 0.694703 | -2.19461 | 0.028192 | 0.501779 | 0.961802 |
| CARMIL2 | 0.467666 | -1.98367 | 0.047293 | 0.220706 | 0.99096 |
| B3GNT4 | 6.461262 | 1.963237 | 0.049619 | 1.003116 | 41.61822 |
| GZMB | 0.676927 | -2.22484 | 0.026092 | 0.480019 | 0.954608 |
| CLEC6A | 0.019306 | -2.05049 | 0.040316 | 0.000444 | 0.840067 |
| ACSS2 | 0.324287 | -2.8414 | 0.004492 | 0.149134 | 0.705155 |
| RASGRP1 | 0.413426 | -2.99416 | 0.002752 | 0.231896 | 0.737059 |
| PARP3 | 0.46246 | -2.06014 | 0.039386 | 0.222042 | 0.963196 |
| HLA-DOB | 0.60003 | -2.06012 | 0.039387 | 0.369088 | 0.975474 |
| SDS | 2.241296 | 2.762172 | 0.005742 | 1.264137 | 3.973784 |
| BATF2 | 0.635449 | -2.12957 | 0.033207 | 0.418644 | 0.964531 |
| CHRM3 | 0.434646 | -2.05953 | 0.039444 | 0.196683 | 0.96052 |
| AFAP1L2 | 0.404585 | -2.21964 | 0.026443 | 0.181968 | 0.899547 |
| CCL25 | 0.030548 | -2.0854 | 0.037033 | 0.001151 | 0.810727 |
| SERPING1 | 0.514127 | -2.55238 | 0.010699 | 0.308463 | 0.856916 |
| ZBED6CL | 0.39751 | -2.57876 | 0.009915 | 0.197168 | 0.801419 |
| GRIA3 | 5.642603 | 2.707225 | 0.006785 | 1.61223 | 19.74841 |
| SEMA4A | 0.41942 | -2.61467 | 0.008931 | 0.218669 | 0.804475 |
| HLA-DQB2 | 0.593189 | -2.77395 | 0.005538 | 0.410148 | 0.857918 |
| PRDM12 | 47.53413 | 2.814194 | 0.00489 | 3.22882 | 699.7893 |
| TNFRSF13C | 0.307839 | -2.15991 | 0.03078 | 0.105685 | 0.896671 |
| ZNF296 | 2.213393 | 2.423007 | 0.015393 | 1.16397 | 4.208966 |
| CD1B | 0.211469 | -1.98933 | 0.046665 | 0.045757 | 0.977326 |
| HLA-DQA2 | 0.712652 | -2.39285 | 0.016718 | 0.539972 | 0.940555 |
| QRFPR | 0.0026 | -2.05071 | 0.040295 | 8.80E-06 | 0.768448 |
| SLC24A4 | 7.313506 | 2.293453 | 0.021822 | 1.335525 | 40.0497 |
| NDRG2 | 0.72781 | -2.00978 | 0.044454 | 0.533895 | 0.992155 |
| TTYH1 | 0.699443 | -2.21725 | 0.026606 | 0.50994 | 0.959368 |
| TMIGD2 | 0.039076 | -2.05681 | 0.039705 | 0.001779 | 0.858419 |
| PRSS12 | 0.577549 | -2.05239 | 0.040132 | 0.341912 | 0.975583 |
| PEG10 | 0.723799 | -2.85121 | 0.004355 | 0.579585 | 0.903897 |
| GPR25 | 0.002918 | -2.16136 | 0.030667 | 1.47E-05 | 0.580493 |
| CDH12 | 3.633387 | 2.393994 | 0.016666 | 1.263526 | 10.44815 |
| CSF2 | 0.00551 | -2.11678 | 0.034278 | 4.46E-05 | 0.680228 |
| SLC6A14 | 0.736768 | -2.00077 | 0.045417 | 0.546219 | 0.993789 |
| SLC18A1 | 7.61E-12 | -2.05056 | 0.04031 | 1.80E-22 | 0.322679 |
| CXCL13 | 0.791412 | -2.00836 | 0.044605 | 0.629874 | 0.994379 |

LASSO, least absolute shrinkage and selection operator; OS, overall survival.

**Table S3** LASSO COX regression analysis identified 11 hub genes

| Gene | Coef |
| --- | --- |
| NUAK2 | -0.12229 |
| ANKDD1B | 1.748856 |
| ACSS2 | -0.36058 |
| RASGRP1 | -0.29247 |
| SDS | 0.225077 |
| SERPING1 | -0.14256 |
| ZBED6CL | -0.09106 |
| HLA-DQB2 | -0.07022 |
| PRDM12 | 0.973098 |
| ZNF296 | 0.020675 |
| PEG10 | -0.08698 |

LASSO, least absolute shrinkage and selection operator.
